# Supplementary material for: Human resident liver myeloid cells protect against metabolic stress in obesity
Source: PubMed Central journal article supplement (PMC10365994; doi:10.1038/s42255-023-00834-7), 2023-07-06
Supplement: 42255_2023_834_MOESM1_ESM.pdf [file 42255_2023_834_MOESM1_ESM.pdf]

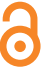

---

# Human resident liver myeloid cells protect against metabolic stress in obesity

---

In the format provided by the authors and unedited

**Supplementary Table 11. Clinical characteristics of patients with obesity included in the study.**

| Clinical parameters                        | Obesity and IS | Obesity and IR | Obesity and T2D |
|--------------------------------------------|----------------|----------------|-----------------|
|                                            | (n=4)          | (n=6)          | (n=3)           |
| Age, years (mean)                          | 43 (29-53)     | 35 (28-45)     | 46 (35-56)      |
| Sex, F/M (n)                               | 4/0            | 6/0            | 3/0             |
| BMI, kg/m <sup>2</sup> , (mean, range)     | 38 (36-41)     | 40 (38-41)     | 36 (34-37)      |
| Diabetes (n)                               | 0              | 0              | 3               |
| HSI (mean, range)                          | 51 (49-52)     | 54 (50-60)     | 48 (44-50)      |
| HbA1c, mmol/mol (mean, range)              | 34 (32-37)     | 36 (27-40)     | 52 (47-57)      |
| HOMA-IR                                    | 2.8 (2.5-3.3)  | 8.4 (3.7-20.3) | 6.1 (5.5-6.8)   |
| Fasting insulin, mIU/L<br>(mean, range)    | 11 (10-12)     | 33 (18-75)     | 17 (13-23)      |
| Fasting Glucose, mmol/L<br>(mean, range)   | 5.7 (5.2-6.1)  | 5.4 (4.6-6.1)  | 8.2 (6.7-9.6)   |
| Creatinine, µmol/L<br>(mean, range)        | 63 (55-72)     | 62 (45-70)     | 75 (58-89)      |
| ALT, µkat/L (mean, range)                  | 0.5 (0.4-0.9)  | 0.7 (0.3-1.4)  | 0.5 (0.3-0.6)   |
| AST, µkat/L (mean, range)                  | 0.4 (0.3-0.6)  | 0.4 (0.2-0.8)  | 0.5 (0.4-0.5)   |
| GGT, µkat/L (mean, range)                  | 0.7 (0.2-1.1)  | 1.6 (0.5-2.0)  | 1.0 (0.8-1.4)   |
| Total Cholesterol, mmol/L<br>(mean, range) | 5.1 (3.9-6.2)  | 5.3 (4.0-6.4)  | 4.9 (3.7-6.0)   |
| LDL-Cholesterol, mmol/L<br>(mean, range)   | 3.1 (1.7-4.0)  | 3.3 (1.8-4.3)  | 2.7 (1.9-3.3)   |
| HDL-Cholesterol, mmol/L<br>(mean, range)   | 1.4 (1.2-1.5)  | 1.1 (1.0-1.3)  | 1.2 (1.1-1.3)   |
| Triglycerides, mmol/mol<br>(mean, range)   | 1.8 (0.7-3.1)  | 2.2 (1.5-3.3)  | 2.0 (1.2-3.4)   |

IS, insulin sensitivity; IR, insulin resistance; T2D, type 2 Diabetes; F/M, female/male; BMI, body mass index; HSI, hepatic steatosis index; HbA1c, haemoglobin A1C; HOMA-IR, homeostatic model assessment of insulin resistance; IU, international units; ALT, Alanine aminotransferase; AST, Aspartate aminotransferase; GGT, gamma glutamyl transferase.

**Supplementary Table 12. Clinical characteristics of the primary human hepatocytes used in the study.**

| Clinical parameters                                                              | Donor 1             | Donor 2    | Donor 3                     | Donor 4     |
|----------------------------------------------------------------------------------|---------------------|------------|-----------------------------|-------------|
| Age, years                                                                       | 27                  | 63         | 50                          | 26          |
| Sex, F/M                                                                         | F                   | M          | M                           | F           |
| BMI, kg/m <sup>2</sup>                                                           | 28.2                | 26.0       | 20.4                        | 17.6        |
| Pathology                                                                        | Anoxia              | Anoxia     | Cerebrovascular<br>accident | Anoxia      |
| Origin                                                                           | African<br>American | Caucasian  | Caucasian                   | Caucasian   |
| Lipid peroxidation levels<br>(MDA) in healthy<br>conditions (mean, s.e.m.)*      | N.A.                | 2.8 (0.47) | 8.4 (0.79)                  | 20.8 (2.33) |
| Lipid peroxidation levels<br>(MDA) after steatosis<br>induction (mean, s.e.m.)** | N.A.                | 7.7 (1.18) | 24.1 (2.70)                 | 32.2 (1.28) |

F/M, female/male; BMI, body mass index; ROS, reactive oxygen species; MDA, malondialdehyde; N.A., not applicable.

\*Average peroxidation levels after 48 hours of treatment with healthy medium (0  $\mu$ M FFA, 5.5 mM glucose, 0.1 nM insulin).

\*\* Average peroxidation levels after 48 hours of treatment with steatogenic medium (480  $\mu$ M FFA, 11.1 mM glucose, 1.7  $\mu$ M insulin).

**Extended Data Table 13. Antibodies used for flow cytometry.**

| <b>Antigen</b>                  | <b>Specie used on</b> | <b>Fluorophore</b> | <b>Clone</b>   | <b>Source</b>           | <b>Dilution used</b> |
|---------------------------------|-----------------------|--------------------|----------------|-------------------------|----------------------|
| <b>Extracellular staining's</b> |                       |                    |                |                         |                      |
| Cd11b                           | Mouse                 | BB515              | M1/70 (RUO)    | BD Biosciences          | 1:100                |
| F4/80                           | Mouse                 | APC                | CI:A3-1        | BioRad                  | 1:10                 |
| CD31                            | Mouse                 | APC-R700           | MEC 13.3       | BD Biosciences          | 1:50                 |
| MHCII                           | Mouse                 | APC-fire750        | M5/114.15.2    | Biologend               | 1:20                 |
| CD49b                           | Mouse                 | BV421              | HMA $\alpha$ 2 | BD Biosciences          | 1:20                 |
| Cd64                            | Mouse                 | BV711              | X54-5/7.1      | Biologend               | 1:20                 |
| CD206                           | Mouse                 | BV785              | C068C2         | Biologend               | 1:20                 |
| ESAM                            | Mouse                 | PE                 | 1G8            | Thermofisher Scientific | 1:50                 |
| CD45                            | Mouse                 | PE-CF594           | 30-F11         | BD Biosciences          | 1:100                |
| CD19                            | Mouse                 | PE-Cy5             | 6D5            | Biologend               | 1:50                 |
| CD3e                            | Mouse                 | PE-Cy5             | 145-2C11       | BD Biosciences          | 1:50                 |
| Tim4                            | Mouse                 | PE-Cy7             | RMT4-54        | Biologend               | 1:50                 |
| CD45                            | Human                 | AF700              | HI30           | Biologend               | 1:200/1:300          |
| CD45                            | Human                 | FITC               | HI30           | BioLegend               | 1:100                |
| CD45                            | Human                 | BV605              | HI30           | Biologend               | 1:100                |
| CD163                           | Human                 | AF647              | GHI/61         | BD Biosciences          | 1:50/1:100           |
| CD163                           | Human                 | PE                 | GHI/61         | BD Biosciences          | 1:10                 |
| CD8a                            | Human                 | APC-Cy7            | SK1            | BD Biosciences          | 1:50                 |
| BDCA-2                          | Human                 | BV421              | 201A           | Biologend               | 1:200                |
| CD161                           | Human                 | BV650              | Dx12           | BD Biosciences          | 1:25                 |
| CD3                             | Human                 | BV786              | SK7            | BD Biosciences          | 1:50                 |
| CD3                             | Human                 | BB515              | UCHT1          | BD Biosciences          | 1:50                 |
| CD3                             | Human                 | PB                 | HIT3a          | Biologend               | 1:50                 |
| CD3                             | Human                 | BV570              | UCHT1          | Biologend               | 1:100                |
| CD25                            | Human                 | BV711              | BC96           | Biologend               | 1:50                 |
| CD141                           | Human                 | PE                 | M80            | Biologend               | 1:100                |
| CD56                            | Human                 | PE-CF594           | NCAM16.2       | BD Bioscience           | 1:100                |
| CD56                            | Human                 | PE-Cy7             | NCAM16.2       | BD Biosciences          | 1:50/1:100           |

|                 |       |          |         |                     |            |
|-----------------|-------|----------|---------|---------------------|------------|
| CD11c           | Human | BV650    | B-ly6   | BD Biosciences      | 1:50       |
| CD127           | Human | PE-Cy7   | A019D5  | Biolegend           | 1:25       |
| CD19            | Human | PE-Cy5   | HIB19   | Biolegend           | 1:100/1:50 |
| CD19            | Human | PB       | SJ25C1  | Biolegend           | 1:50       |
| CD19            | Human | BV510    | SJ25C1  | BD Biosciences      | 1:100      |
| CD14            | Human | BV605    | M5E2    | Biolegend           | 1:200      |
| CD14            | Human | Alexa647 | MφP9    | BD Biosciences      | 1:100      |
| CD14            | Human | PE-Cy5   | 61D3    | E-bioscience        | 1:100      |
| TCR Va72        | Human | PE       | 3C10    | Biolegend           | 1:50       |
| CD4             | Human | BV570    | RPA-T4  | Biolegend           | 1:50       |
| CD206           | Human | BB515    | 19.2    | BD Bioscience       | 1:200      |
| CD206           | Human | PE-CF594 | 19.2    | BD Biosciences      | 1:50       |
| CD206           | Human | BV421    | 19.2    | BD Biosciences      | 1:50       |
| CD206           | Human | BB515    | 19.2    | BD Biosciences      | 1:100      |
| HLA-DR          | Human | BUV395   | G46-6   | BD Bioscience       | 1:25       |
| HLA-DR          | Human | BV785    | L243    | Biolegend           | 1:50       |
| HLA-DR          | Human | BV711    | L243    | Biolegend           | 1:25       |
| HLA-DR          | Human | APC-Cy7  | L243    | Biolegend           | 1:25/1:50  |
| CD16            | Human | BUV737   | 3G8     | BD Bioscience       | 1:50       |
| CD16            | Human | BV786    | 3G8     | BD Biosciences      | 1:50/1:25  |
| CD16            | Human | BV711    | 3G8     | BD Biosciences      | 1:100      |
| CD31            | Human | BV605    | WM59    | BD Biosciences      | 1:50       |
| HLA-A3          | Human | FITC     | REA 950 | Miltenyi            | 1:50       |
| HLA-B5          | Human | Biotin   | BIH0209 | One                 | 1:10       |
| (51,52)         |       |          |         | Lambda/Thermofisher |            |
| HLA-B12         | Human | Biotin   | REA 138 | Miltenyi            | 1:20       |
| HLA-A11         | Human | Biotin   | BIH0084 | One                 | 1:20       |
|                 |       |          |         | Lambda/Thermofisher |            |
| HLA-B15,<br>B57 | Human | Biotin   | BIH0507 | One                 | 1:10       |
|                 |       |          |         | Lambda/Thermofisher |            |

### Secondary extracellular staining's

|              |      |       |    |               |
|--------------|------|-------|----|---------------|
| Streptavidin | N.A. | BV650 | nd | BD Bioscience |
|--------------|------|-------|----|---------------|

### Cell viability staining's

|                                 |        |        |         |                         |                     |
|---------------------------------|--------|--------|---------|-------------------------|---------------------|
| Live dead<br>fixable            | Aqua   | N.A.   | N.A.    | Invitrogen/Thermofisher | 1:1000              |
| Live dead<br>fixable            | Violet | N.A.   | N.A.    | Biologend               | 1:1000              |
| Sytox Blue                      | Blue   | N.A.   | N.A.    | Invitrogen/Thermofisher | 1:1000 or<br>1:3000 |
| <b>Intracellular staining's</b> |        |        |         |                         |                     |
| CD68                            | Human  | PE-Cy7 | Y1/82A  | Biologend               | 1:16                |
| MRP-14<br>(S100A9)              | Human  | PE     | MRP 1H9 | Biologend               | 1:800/1:50          |

---

**Supplementary Table 14. Antibodies used for Immunofluorescence microscopy.**

| <b>Target</b>               | <b>Clone</b>  | <b>Specie</b> | <b>Isotype</b> | <b>Source</b>           | <b>Dilution</b> |
|-----------------------------|---------------|---------------|----------------|-------------------------|-----------------|
| CD68                        | KP1 + C68/684 | Mouse         | IgG1           | Abcam                   | 1:50            |
| S100A9                      | polyclonal    | Rabbit        | IgG            | Abcam                   | 1:50            |
| Ki-67                       | 1O15          | Rabbit        | IgG            | Sigma-Aldrich           | 1:50            |
| VISIG4                      | EPR22576-70   | Rabbit        | IgG            | Abcam                   | 1:50            |
| <b>Secondary staining's</b> |               |               |                |                         |                 |
| Anti-mouse AF647            | N.A.          | Goat          | N.A.           | Thermofisher Scientific | 1:500           |
| Anti-mouse AF555            | N.A.          | Goat          | N.A.           | Thermofisher Scientific | 1:500           |
| Anti-rabbit AF488           | N.A.          | Goat          | N.A.           | Thermofisher Scientific | 1:500           |
| Anti-rabbit AF555           | N.A.          | Goat          | N.A.           | Thermofisher Scientific | 1:500           |

**Supplementary Table 15. Antibodies used for Phenocycler imaging.**

| <b>Target</b>                         | <b>Antibody<br/>barcode</b> | <b>Clone</b> | <b>Fluorophore<br/>barcode</b> | <b>Source (primary<br/>antibody)</b> |
|---------------------------------------|-----------------------------|--------------|--------------------------------|--------------------------------------|
| CD3e                                  | BX045                       | EP449E       | RX045-Cy5                      | Abcam                                |
| CD11c                                 | BX024                       | 118/A5       | RX024-Cy5                      | Thermofisher                         |
| CD31                                  | BX001                       | EP3095       | RX001-AF750                    | Abcam                                |
| CD45RO                                | BX017                       | UCHL1        | RX017-Atto550                  | Biologend                            |
| CD68                                  | BX015                       | KP1          | RX015-Cy5                      | Thermofisher                         |
| CD107a                                | BX006                       | H4A3         | RX006-Cy5                      | Biologend                            |
| HLA-DR                                | BX033                       | EPR3692      | RX033-Cy5                      | Abcam                                |
| Ki67                                  | BX047                       | B56          | RX047-Atto550                  | BD Biosciences                       |
| Mac2/Galectin-3                       | BX035                       | M3/38        | RX035-Atto550                  | Biologend                            |
| Pan-Cytokeratin                       | BX019                       | AE-1/AE-3    | RX019- AF750                   | Biologend                            |
| IDO1                                  | BX027                       | V1NC3IDO     | RX027- CY5                     | Thermofisher                         |
| <b>In-house conjugated antibodies</b> |                             |              |                                |                                      |
| SMA (ACTA2)                           | BX028                       | N.A.         | RX028-AF750                    | N.A.                                 |
| CD163                                 | BX020                       | N.A.         | RX020-Atto550                  | N.A.                                 |
| S100A9                                | BX021                       | polyclonal   | RX021-Cy5                      | Abcam                                |



**Supplementary Table 16. Phenocycler panel and experimental information.**

**Phenocycler panel**

| <b>Cycle</b> | <b>Atto550 (c-2)</b> | <b>Cy5 (c-3)</b> | <b>AF750 (c-4)</b> |
|--------------|----------------------|------------------|--------------------|
| Blank        | -                    | -                | -                  |
| 1            | Mac2                 |                  | CD31               |
| 2            | CD45RO               | CD3e             |                    |
| 3            |                      | IDO1             | SMA                |
| 4            |                      | CD11c            |                    |
| 5            | Ki67                 | CD107a           |                    |
| 6            |                      | HLA-DR           | Pan CK             |
| 7            |                      | CD68             |                    |
| 8            | CD163                |                  |                    |
| 9            |                      | S100A9           |                    |
| Blank        | -                    | -                | -                  |
